# Supplementary material for: Wallabies – Analyse du premier groupe de 2013
Source: Royal Society of Chemistry journal article supplement (doi:10.1039/d0ra05207h), 2013-01-01
Supplement: d0ra05207h1.pdf [file d0ra05207h1.pdf]

## Supporting Information

### **Simultaneous detection of squamous cell carcinoma antigen and cancer antigen 125 in cervical cancer serum using nano-Ag polydopamine nanospheres in a SERS-based lateral flow immunoassay**

Ji Xia<sup>ab</sup>, Yifan Liu<sup>ab</sup>, Menglin Ran<sup>ab</sup>, Wenbo Lu<sup>d</sup>, Liyan Bi<sup>e</sup>, Qian Wang<sup>a</sup>, Dan Lu<sup>abf\*</sup>

and Xiaowei Cao<sup>abcd\*f\*</sup>

<sup>a</sup>Department of Obstetrics and Gynecology, College of Clinical Medicine, Yangzhou University, Yangzhou, PR China

<sup>b</sup>The First Clinical College, Dalian Medical University, Dalian, PR China

<sup>c</sup>Institute of Translational Medicine, Medical College, Yangzhou University, Yangzhou, PR China

<sup>d</sup>Key Laboratory of Magnetic Molecules and Magnetic Information Materials (Ministry of Education), School of Chemistry and Material Science, Shanxi Normal University, Linfen, 041004, PR China.

<sup>e</sup>Transformative Otolaryngology and Neuroscience Center, College of Special Education, Binzhou Medical University, Yantai 264003, PR China

<sup>f</sup>Jiangsu Key Laboratory of Integrated Traditional Chinese and Western Medicine for Prevention and Treatment of Senile Diseases, Yangzhou University, Yangzhou, PR China

\*E-mail: ludan1968@126.com and cxw19861121@163.com

## Results and discussion

### SERS imaging of SERS-based LFA

In order to investigate the uniformity of the surface SERS signal, a mapping experiment of T line was carried out after adding 4-ATP and DTNB on the surface. As displayed in Fig. S1A and B, the scanning range on the T line was  $40 \times 40 \mu\text{m}^2$ , the intensity of characteristic peak at  $1083 \text{ cm}^{-1}$  and  $1330 \text{ cm}^{-1}$  were displayed by the color of SERS mapping signal according to a color scheme ranging from blue (lowest intensity) to red (highest intensity). Although some polymers can still be found, the SERS-based LFA strip had an uniform SERS enhancement effect.

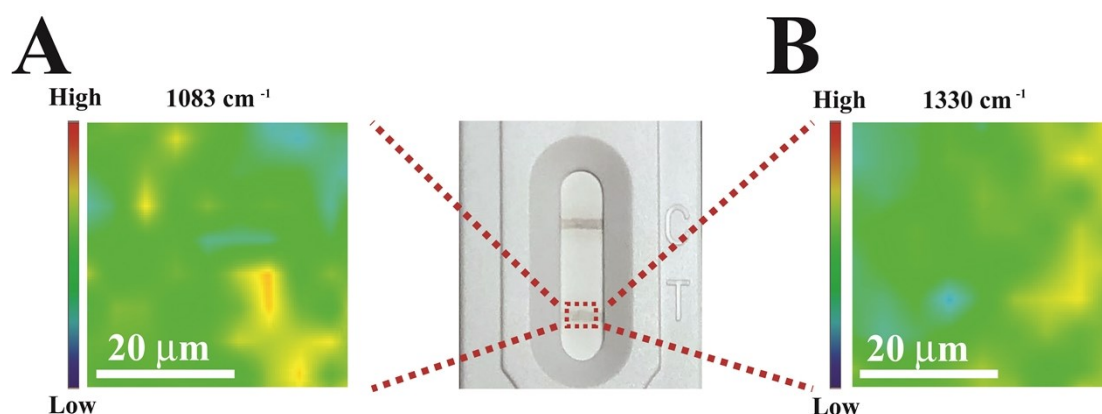

**Fig. S1** (A) SERS mapping of 4-ATP measured at  $1083 \text{ cm}^{-1}$  using the T line of SERS-based LFA strip. (B) SERS mapping of DTNB measured at  $1330 \text{ cm}^{-1}$  using the T line of SERS-based LFA strip.

### The stability of SERS-based LFA.

Fig. S2 showed the stability of SERS-based LFA strip. The SERS-based LFA strips were stored at room temperature for 0 day, 2 days, 4 days, 6 days, 8 days and 10 days. Fig. S2A showed the stability of SERS-based LFA strip, no obvious changes were observed in both of the SERS spectral peak and shape. Fig. S2B displayed corresponding scattergram of the peak intensity at  $1330 \text{ cm}^{-1}$ , the peak intensity at 10 days only reduced by 9.32% compared with the one at 0 day. These results indicated SERS-based LFA strip has a stable SERS enhancement effect.

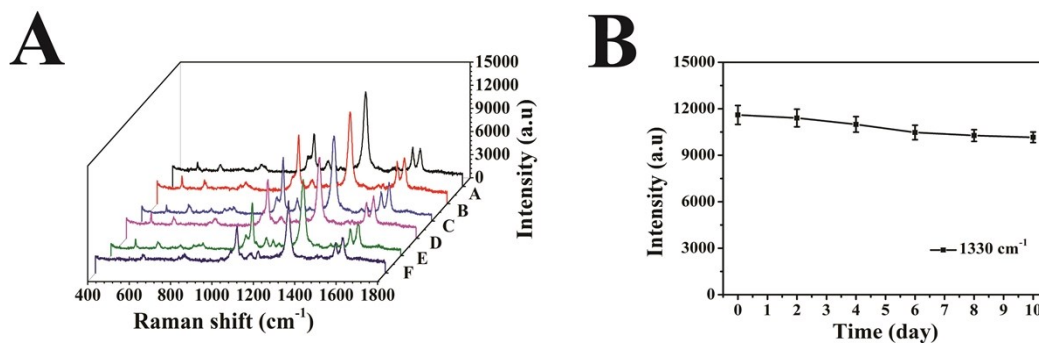

**Fig. S2** Stability of the SERS-based LFA strip. (A) Corresponding SERS spectra of SERS-based LFA strips (0 day, 2 days, 4 days, 6 days, 8 days and 10 days). (B) Corresponding scattergram of the peak intensity at 1330 cm<sup>-1</sup>.

### The stability of the PDA@Ag-NPs

Fig. S3A illustrated the stability of PDA@Ag-NPs. The PDA@Ag-NPs made at different times (0 day, 1 day, 3 days, 5 days and 7 days), which was labeled with the mixture of 4-ATP and DTNB were detected by SERS. As shown in Fig. S3B, with 1330 cm<sup>-1</sup> as the reference peak, the small deviation of the five peak intensities (8.74%) indicated that the good stability of PDA@Ag-NPs preparation.

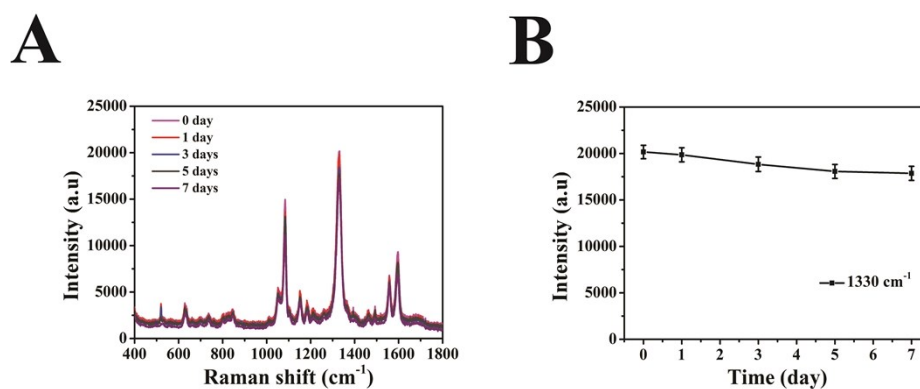

**Fig. S3** (A) The stability of the PDA@Ag-NPs labeled by the mixture of 4-ATP and DTNB. (B) SERS intensities at 1330 cm<sup>-1</sup> of PDA@Ag-NPs for 0 day, 1 day, 3 days, 5 days and 7 days.
